1 **Title:** A simple spatially explicit neutral model explains range size distribution of reef fishes

2 **Short running title:** neutral model of range size distributions

3 **Authors:** Adriana Alzate<sup>1,2,3</sup>, Thijs Janzen<sup>4,5</sup>, Dries Bonte<sup>3</sup>, James Rosindell<sup>6\*</sup> & Rampal S.

4 Etienne<sup>1\*</sup>

5 **Author affiliations:**

6 <sup>1</sup> Groningen Institute for Evolutionary Life Sciences, University of Groningen, Box 11103,

7 9700 CC Groningen, The Netherlands

8 <sup>2</sup> Terrestrial Ecology Unit, Ghent University, B-9000 Ghent, Belgium

9 <sup>3</sup> ECOMARES, Calle 39 Norte # 3CN-89, Cali, Colombia

10 <sup>4</sup> Department of Evolutionary Theory, Max Planck Institute for Evolutionary Biology, Plön,

11 Germany

12 <sup>5</sup> Institute for Biology and Environmental Sciences, Carl von Ossietzky University, 26111

13 Oldenburg, Germany

14 <sup>6</sup> Department of Life Sciences, Imperial College London, Silwood Park Campus, Buckhurst

15 Road, Ascot SL5 7PY, UK

16 \*Joint last authors

17

18

19 **Abstract**

20 *Aim*

21 The great variation in range sizes among species has fascinated ecologists for decades. In  
22 reef-associated fish species, which live in fragmented habitats and adopt a wide range of  
23 dispersal strategies, we may expect species with greater dispersal ability to spread over larger  
24 ranges. However, empirical evidence for such a positive relationship between dispersal and  
25 range size in reef fishes remains scarce. Here, we unveil the more nuanced role of dispersal on  
26 the range size distribution of reef associated fishes using empirical data and a novel spatially  
27 explicit model.

28 *Location*

29 Tropical Eastern Pacific

30 *Major taxa studied*

31 Reef-associated fishes

32 *Methods*

33 We estimated range size distributions for six different guilds of all reef-associated fishes with  
34 different dispersal abilities. We used a one-dimensional spatially explicit neutral model,  
35 which simulates the distribution of species along a linear coastline to explore the effect of  
36 dispersal, speciation and sampling on the distribution of range sizes. Our model adopts a more  
37 realistic gradual speciation process (protracted speciation) and incorporates important long  
38 distance dispersal events with a fat-tail dispersal kernel. We simulated our model using a  
39 highly efficient coalescence approach, which guarantees the metacommunity, is sampled at  
40 dynamic equilibrium. We fitted the model to the empirical data using an approximate  
41 Bayesian computation approach, with a sequential Monte Carlo algorithm.

42 *Results*

43 Stochastic birth, death, speciation and dispersal events alone can accurately explain empirical  
44 range size distributions for six different guilds of tropical, reef-associated fishes. Variation in  
45 range size distributions among guilds are explained purely by differences in dispersal ability  
46 with the best dispersers covering larger ranges.

47 *Main conclusions*

48 A simple combination of neutral processes with guild-specific dispersal ability provides a  
49 general explanation for both within- and across-guild range size variation. Our results support  
50 the theoretically expected, but empirically much debated, hypothesis that dispersal promotes  
51 range size.

52

53 **Keywords:** spatially explicit, neutral model, dispersal, range size, range size distribution, reef  
54 fishes.

55

56

57 **Introduction**

58 What is driving the large natural variation in the range size of species (Gaston 2003)?

59 Answers to this long-standing question in macroecology were initially provided by

60 investigating the effects of speciation and extinction processes (Anderson 1985, Gaston &

61 Chown 1999). However, as suggested by Gaston and He (2002), these processes are not

62 sufficient to explain range size distributions in nature, as they only affect the creation,

63 division and removal of ranges. Among the other factors that could influence range size,

64 dispersal ability of individuals is the one with the most important: dispersal is needed for the

65 colonization of new habitats, and for persistence in existing habitats that are suboptimal,

66 where demographic rescue can act to avoid local extinction (MacArthur & Wilson 1967,

67 Brown & Kodric-Brown 1977). Dispersal also promotes gene flow, bringing the genetic

68 variability necessary for adaptation, which is important for successful colonization and

69 ultimately range expansion (Holt & Gomulkiewicz 1996). One group of organisms for which

70 dispersal seems especially important is reef fishes because they live in habitats that are highly

71 fragmented; making the ability to disperse key for habitat colonization, establishment, and

72 range expansion. Despite theoretical expectations predicting a positive relationship between

73 dispersal and range size, empirical evidence for this in reef fishes remains scarce (Lester &

74 Ruttenberg 2005, Ruttenberg & Lester 2015, Mora *et al.* 2012, Luiz *et al.* 2013).

75

76 There are many possible explanations for the apparent lack of a positive range size-dispersal

77 relationship; these reflect the many processes that potentially drive range size (reviewed in

78 Gaston 2003) including speciation, local extinction, and range size changes during a species'

79 lifetime (Webb & Gaston 2000). Firstly, range size is likely to vary with species age (Webb &

80 Gaston 2000), i.e. older species might have attained larger ranges than newly formed species.

81 Secondly, species range dynamics are affected by biological interactions, eco-evolutionary  
82 dynamics and by their behavioral and functional traits (Stahl *et al.* 2014). Thirdly, sampling  
83 intensity and detection probability vary across space and across species (Dennis *et al.* 1999,  
84 Alzate *et al.* 2014), and such sampling biases could also drive variation in range size. Finally,  
85 stochastic events, especially during early life, may bring additional noise to the final range  
86 size, making it difficult to find general patterns.

87

88 The dispersal component of range size-dispersal relationships is also problematic: dispersal is  
89 a complex trait, varying at several life stages, e.g. during departure, transfer and settlement  
90 phases (Bonte 2012), in ways that are not easily quantifiable. This may influence the outcome  
91 of studies examining the role of dispersal. For example, many studies of dispersal on reef  
92 fishes have focused primarily on the larval stage (Lester & Ruttenberg 2005, Lester *et al.*  
93 2007, Mora *et al.* 2012), despite evidence that dispersal also occurs in earlier life stages as  
94 eggs and in late life stages as adult fishes (Leis 1978, Kaunda-Arara & Rose 2004,  
95 Appeldoorn *et al.* 1994, Addis *et al.* 2013).

96

97 Given the complexity of the problem, a promising approach for understanding the drivers of  
98 range sizes (in contrast to the many correlative studies) is to model the process, including one  
99 or several possible factors affecting range sizes. Although some previous studies have  
100 attempted to explain range sizes using colonization-extinction models (Hanski 1982) or  
101 population models (Gaston & He 2002), they were not developed to explain variation in range  
102 size across many species exploring several factors. Here, we apply a variation of the unified  
103 neutral theory of biodiversity and biogeography (Hubbell 2001), originally used to explain  
104 other macroecological patterns such as species abundance distributions, species area  
105 relationships and beta-diversity. We extend the neutral model to include spatially explicit

106 dynamics and a more realistic speciation process (Rosindell *et al.* 2008, Rosindell *et al.*  
107 2011), both of which we expect to be important for a study of interspecific variation in range  
108 sizes. This mechanistic model provides a way to quantitatively assess how dispersal can  
109 influence species range size distributions, while at the same time considering other interacting  
110 factors, including both sampling and speciation, that are known to affect range size (Gaston  
111 2003). We tested the ability of our model to explain variation in range sizes by comparing its  
112 predictions against empirical range size distributions of a complete reef fish assemblage in a  
113 well-defined region: The Tropical Eastern Pacific (TEP). We made predictions of range size  
114 distributions for each of six distinct guilds with different dispersal characteristics in the early  
115 (egg and larval) as well as the later adult life stages. Our model is neutral and so excludes any  
116 within-guild niche-based processes and individual differences. Crucially, by applying  
117 independent neutral models to each of the six guilds we were able to focus on studying the  
118 effects of different dispersal abilities for each guild in isolation from other complicating  
119 factors such as environmental preference. With our spatially explicit neutral model, we tested  
120 firstly whether range size distributions within guilds of reef fishes can be explained by neutral  
121 factors alone and secondly whether variation in range size distribution across guilds can be  
122 explained by differences in dispersal ability.

123

## 124 **Methods**

### 125 ***Reef-associated fish data***

126 From the online database “Shorefishes of the Tropical Eastern Pacific - SFTEP” (Robertson &  
127 Allen 2016), we collated spatial coordinates of species occurrences (45,860 records) for all  
128 bony fishes (575 species) associated to reef habitats reported in the TEP. We used only  
129 records inside the TEP region: 24° N (outer coast of California gulf, including all the inner  
130 coast) and 4° S (SFTEP, Robertson & Allen 2016).

131 Reef fish species were classified in six different dispersal guilds according to traits related to  
132 dispersal: spawning mode and adult mobility. We classified spawning mode in two types:  
133 pelagic and non-pelagic. The differences in this early life history might confer diverse  
134 capacities for dispersal (Riginos *et al.* 2011, Leis *et al.* 2013). Pelagic spawners release their  
135 eggs in the water column, which are passively transported by water currents until the larvae  
136 hatch and are able to better control active swimming (Stobutzki 1997, Leis *et al.* 2013). This  
137 increase in the pre-hatching dispersal period might have strong and broader effect on dispersal  
138 in the pelagic environment (Leis *et al.* 2013). Contrary to pelagic spawners, for which both  
139 the egg and larval phases are pelagic, non-pelagic spawners either attach their eggs to the  
140 substrate, are livebearers, or keep their eggs in the mouth or pouch until they hatch. Their  
141 larvae usually emerge at larger sizes and are more mature than the larvae of non-pelagic  
142 spawners (Wootton 1992, Leis *et al.* 2013), resulting in an early control of active swimming,  
143 therefore limiting dispersal (Munday & Jones 1998, Leis 2006, Leis *et al.* 2013). We  
144 classified adult mobility following Floeter and colleagues (2004) as low, medium and high.  
145 Low adult mobility denotes site-attached species with a restricted home range ( $< 10\text{m}^2$ ).  
146 Medium adult mobility denotes species that are weakly mobile, relatively sedentary, with  
147 close association to the substrate and that can be distributed over the entire reef area ( $<$   
148  $\sim 1000\text{m}^2$ ). High adult mobility denotes species that are highly mobile with wide horizontal  
149 displacement and that occur in the water column (Floeter *et al.* 2004). Mobility for each  
150 species was assigned depending on the taxonomical level at which information was reported:  
151 species, genus or family adult mobility. In some cases, mobility information was not  
152 available, but could be assigned according to the biology of the species, e.g. pearlfishes  
153 (Family Carapidae) that are known to live inside the anal pore of sea cucumbers were all  
154 classified as having low adult mobility. Information on adult mobility was obtained from  
155 several sources (data base in Suppl. Mat). Information on spawning mode was obtained from

156 the SFTEP online database (Robertson & Allen 2016). Pelagic larvae duration, although often  
157 used when studying range size of reef fishes, is not known for the majority (69%) of species  
158 in the TEP region, making it unsuitable for this study.

159

### 160 *Measuring range size*

161 The range size of each species was calculated using a novel metric, developed for maximizing  
162 comparability between simulated and observed range sizes: coastline distance. In contrast  
163 with other traditional metrics, e.g. maximum linear distance, latitudinal and longitudinal  
164 extent (Gaston 1994), coastline distance does not underestimate or overestimate range size  
165 due to the particular spatial configuration of the TEP (Fig. S1). We defined coastline distance  
166 as the contour distance (measured using units of 100 km) between the most distant points  
167 along the coast line where the species was reported. However, the east and west coast of the  
168 Californian gulf are treated as a single coast because the distance between opposing coasts is  
169 likely too small to substantially restrict dispersal at similar latitudes (Fig. S1). All distance  
170 measurements were calculated in kilometers using the function `geodist` from the R package  
171 `gmt` (Magnusson 2015) and transformed in relative values, where 100% is the coastline  
172 distance between the latitudes 24N and 4S.

173

### 174 *Spatially explicit neutral model*

175 We used a one-dimensional spatially explicit neutral model to simulate the spatial distribution  
176 of species along a linear coastline. This configuration best reflects the particular geographical  
177 distribution of reefs (coral and rocky) in the TEP region: a long coastline with a narrow  
178 continental platform. As in the original neutral model (Hubbell 2001), the habitat is saturated  
179 (zero-sum dynamics) and the species identity of an individual has no bearing on its chances of  
180 dispersal, mortality, reproduction, the initiation of speciation or the completion of speciation



181 (see below). At every time step one individual, chosen at random according to a uniform  
182 distribution, dies and is replaced by the newborn offspring of an existing individual  
183 determined by a Pareto dispersal kernel:

$$184 \quad f(x) = \begin{cases} \frac{\alpha X_m^\alpha}{x^{\alpha+1}}, & x \geq X_m \\ 0, & x \leq X_m \end{cases}$$

185 where  $X_m$  is a scale parameter (mode) and  $\alpha$  is a shape parameter, that changes the distribution  
186 from an exponential-like distribution (large value of  $\alpha$ ) to a very fat-tailed distribution (lower  
187 values of  $\alpha$ ), i.e. many short distance dispersal events are combined with an occasional very  
188 long-distance dispersal event. Random samples from the distribution can be calculated using  
189 the inverse random sampling formula for the range size  $T$ :

$$T = \frac{X_m}{U^{1/\alpha}}$$

190 where  $U$  is a random variate drawn from a uniform distribution between 0 and 1. To separate  
191 the effects of the shape of the distribution and the mean dispersal distance ( $X_{\text{mean}}$ ), we rescaled  
192 the Pareto distribution such that  $X_m = X_{\text{mean}}$ , i.e. that  $X_m$  reflects the mean dispersal distance,  
193 and  $\alpha$  still reflects the shape (see Suppl. Mat. for full derivation). The Pareto distribution  
194 considers the possibility of long distance dispersal, in line with empirical dispersal  
195 distributions of reef fishes (Jones 2015).

196

197 In contrast to the classical neutral model, we assumed that speciation is a gradual process  
198 rather than an instantaneous event (Rosindell *et al.* 2010). When a birth event takes place, an  
199 incipient species can form with probability  $\mu$ ; the newborn is still observed in the model as  
200 being conspecific to its parent, but if sufficient time passes and descendants of the newborn  
201 individual survive, those descendants will be considered a new good species rather than an  
202 incipient one. This protracted speciation model entails one extra parameter  $\tau$ : ‘protractedness’,  
203 the number of generations required for an incipient species to become a real species, where

204 one generation means half of the turnover of the community because generations overlap.  
205 Both speciation probability and protractedness influence the generation of new species, the  
206 true speciation rate is a function of both parameters ( $\mu/1 + \tau$ ) as described by Rosindell *et al.*  
207 (2010). We simulated the spatially explicit neutral model using a coalescence approach  
208 (Rosindell *et al.* 2008), which improves simulation efficiency while guaranteeing the  
209 metacommunity is sampled at dynamic equilibrium and thus eliminating the problem of  
210 determining an appropriate ‘burn-in time’ for the simulations.

211

### 212 ***Model behavior***

213 We explored the effect of dispersal on the distribution of range sizes by running simulations  
214 using various dispersal kernels, which differ in their  $X_{\text{mean}}$  and  $\alpha$  parameter values. We used a  
215 linear lattice composed of 100,000 ‘units’ which could be thought of as individual organisms  
216 or larger cohorts of individuals behaving in a similar manner (Harfoot *et al.* 2014). We found  
217 that larger lattices produce similar results (Fig. S2), but are computationally intractable for  
218 parameter fitting exercises that require many successive simulation’ runs. As in the real world  
219 not all individuals are sampled, the proportion of sampled individuals (sampling percentage)  
220 could therefore affect the observed distribution of ranges. Sampling was performed by  
221 randomly choosing individuals along the linear lattice, and only sampled individuals were  
222 used to quantify range sizes. Although sample areas along the TEP are not random, sampling  
223 in a realistic manner produces virtually similar results as with random sampling (Fig. S3). We  
224 examined the effect of dispersal ( $X_{\text{mean}}$  and  $\alpha$ ), speciation, protractedness and sampling  
225 percentage on the distribution of species’ range sizes. As species age is also suggested to be  
226 positively related with range size (Gaston 2003), we also explored the effect of interspecific  
227 variation in speciation rates on the distribution of range sizes. When speciation rate is high,  
228 species are in average younger, thus affecting the final range size distribution.

229

230 In our default scenario, we used the following parameter values:  $X_{\text{mean}} = 0.02$ ,  $\alpha = 3.0$ ,  
231 sampling percentage  $s = 100\%$ , speciation probability  $\mu = 0.0005$ , protractedness  $\tau = 10$ . We  
232 then performed 5 sets of alternative scenarios, in which either values of  $X_{\text{mean}}$ ,  $\alpha$ , sampling  
233 percentage, speciation probability or protractedness were altered. We explored 5 different  
234  $X_{\text{mean}}$  and  $\alpha$  values ( $X_{\text{mean}} = [2\%, 5\%, 10\%, 20\%, 40\%]$ ,  $\alpha = [1.5, 2.0, 2.5, 3.0, 3.5]$ ), 5  
235 different sampling percentages ( $s = [1\%, 5\%, 20\%, 50\%, 100\%$  of all individuals]) and 4  
236 different speciation probability and protractedness values ( $\mu = [5 \times 10^{-2}, 5 \times 10^{-3}, 5 \times 10^{-4}, 5$   
237  $\times 10^{-5}]$ ,  $\tau = [0, 10, 100, 1000]$ ).

238

239 At the end of our simulations we estimated the range size for each species as the linear  
240 distance (which is equivalent to coastline distance in a one-dimensional model) between the  
241 most distant points where the species is recorded. The range size was measured in relative  
242 terms, relative to the total lattice size. We replicated the simulations 100 times and calculated  
243 mean and 95% CI values. Range sizes were transformed to percentages (100 % total size of  
244 the linear lattice).

245

### 246 ***Model fitting***

247 In order to estimate dispersal ( $X_{\text{mean}}$  and  $\alpha$ ), sampling, speciation and protractedness values  
248 that produced range size distributions matching those of empirical data, we used an  
249 approximate Bayesian computation approach, with a sequential Monte Carlo algorithm (ABC-  
250 SMC) as described by Toni *et al.* (2009). To assess the similarity between the data and  
251 simulation outcomes, we calculated the sum of squares between the inverse cumulative  
252 distribution for the simulated and empirical data, based on the differences in both the range  
253 size distributions and species richness levels. Progression of the acceptance threshold was

254 modeled as an exponentially decreasing function, where the threshold at iteration  $t$  of the  
255 ABC-SMC algorithm was:  $500 \exp\left(-\frac{1}{4}t\right)$ . We assumed the following prior distributions for  
256 each parameter (on a  $\log_{10}$  scale, e.g.  $U_{10}(0,1) = 10^{U(0,1)}$ , where  $U$  is a uniform distribution),  
257  $X_{\text{mean}}$ :  $U_{10}(-4, -0.25)$ ,  $\alpha$ :  $U_{10}(0,1)$ , speciation initiation rate:  $U_{10}(-5, 0)$ , protractedness:  $U_{10}(0,5)$   
258 and sampling:  $U_{10}(-4, 0)$ . Per ABC-SMC iteration, we used 10,000 particles. The ABC-SMC  
259 algorithm ran for 20 iterations, or until the acceptance rate dropped below 1 in 1,000,000  
260 proposed parameter combinations. Perturbation of the parameters was performed on a  $\log_{10}$   
261 scale, to avoid parameters reaching a negative value. Parameters were perturbed by first  
262 taking the  $\log_{10}$ , then adding a random number drawn from a normal distribution with mean  
263 zero and standard deviation 0.05, after which we exponentiated the parameter again. After  
264 exponentiation, the parameter values were checked whether they still lay within the prior  
265 ranges; if not, the particle was rejected. For each dataset we performed 10 replicate fits.

266

267 To assess the accuracy of our inference method, we generated artificial datasets using known  
268 parameters, and performed the same ABC-SMC inference procedure as used on the empirical  
269 data. If our method is accurate, inferred parameter values should be identical to the known  
270 parameters used to generate the artificial data. Artificial data was generated using values for  
271  $X_{\text{mean}}$  of 0.001, 0.01, 0.1 or 0.2,  $\alpha$  of 2, 4, 6 or 8,  $s$  of 0.025 or 0.25, and two different  
272 speciation regimes: one with high speciation (0.01) and high protractedness (2500), and one  
273 with low speciation (0.001) and low protractedness (25). For each parameter combination we  
274 generated 10 artificial datasets. In total we performed  $(10 \times 4 \times 4 \times 2 \times 2) = 640$  ABC-SMC  
275 inferences to assess accuracy.

276

277 The one-dimensionality of our neutral model means the coastline distance metric treats the  
278 coast of the TEP as also being one-dimensional (distance is only measured along the coast,

279 not as a birds-flight distance); this maximises the comparability of empirically observed range  
280 sizes with those simulated by our one-dimensional, spatially explicit neutral model. In  
281 addition, we excluded observations from oceanic islands when quantifying range sizes, again  
282 to maximize comparability with simulated ranges. Our model was written in C++ and all post  
283 simulation analyses were performed with R, version 3.3.1 (R core team 2016).

284

## 285 **Results (883)**

### 286 *Range size distribution of reef associated fishes in the TEP*

287 Irrespective of their adult mobility, all three guilds of pelagic spawners have a relatively high  
288 proportion of species with large ranges (Fig. 1a). The range size distributions of pelagic  
289 spawners are qualitatively similar, with more than 70% of the species having ranges larger  
290 than 50% of the maximum possible range or our sampling region. In contrast, the range size  
291 distribution of non-pelagic spawners depends strongly on the capacity of adult fishes to  
292 disperse. Within the non-pelagic spawners, the lowest dispersive guild has the highest  
293 proportion of species with small ranges and the lowest proportion of species with large ranges  
294 (Fig. 1a). While more than half of the species with medium or high adult mobility have ranges  
295 larger than 80% of the maximum range, for species with low mobility only a fifth of species  
296 have ranges larger than 80% of the maximum.

297

### 298 *Spatially explicit neutral model*

299 The strongest effects on the distribution of range sizes are caused by variation in mean  
300 dispersal distance ( $X_{\text{mean}}$ ), speciation rate, and protractedness (Fig. 2). Dispersal ( $X_{\text{mean}}$  and  $\alpha$ )  
301 has a strong effect on the shape of the range size distribution. The contributions of  $X_{\text{mean}}$  and  $\alpha$   
302 to the effect of dispersal on the range size distribution are not equal however, with the  
303 majority of the dispersal effect resulting from  $X_{\text{mean}}$  (Fig. 2a). As  $X_{\text{mean}}$  increases, the

304 proportion of species with large ranges increases as well. In contrast, the shape parameter of  
305 the dispersal kernel ( $\alpha$ ) has limited influence over the distribution of range sizes (Fig. 2b).  
306 Speciation exerts a strong effect on the distribution of ranges, with a higher proportion of  
307 species having a large range size when speciation rate is low. A high speciation rate produces  
308 more new species, which initially have small ranges, thus a decrease in the number of species  
309 with large ranges, and a (potentially unrealistically) high number of species in total (Fig. 2d).  
310 The effect of protractedness is similar to that of speciation, as it modifies the number of  
311 species and the rate at which these are created. The higher the protractedness, the longer the  
312 time before an incipient species becomes a good species, and as a result fewer species have  
313 small ranges (Fig. 2e). Sampling affects the distribution of ranges in a different way to  
314 dispersal, speciation or protractedness: a lower sampling effort leads to more species with few  
315 individuals and thus a higher proportion of species with apparently small ranges (Fig. 2c).

316

317 Prior to fitting the model to empirical data, we used the ABC-SMC fitting procedure on  
318 simulated range size distributions with a known set of parameters (known values for  $X_{\text{mean}}$ ,  $\alpha$ ,  
319 speciation, sampling and protractedness). We found that posterior distributions of parameter  
320 values were generally closely matching the real values (Fig. S4), indicating that our fitting  
321 procedure was appropriate for estimating the parameter values of our neutral model. Only in  
322 the case of the  $\alpha$  parameter (measuring the shape of the dispersal kernel), were estimates were  
323 not accurate, likely due the low strength of  $\alpha$  in explaining range size variation (see above).

324

325 The same fitting procedure on empirical range size distributions, for the six dispersal guilds of  
326 reef fishes, showed adequate fit between observed and predicted range size distributions (Fig.  
327 3). Furthermore, in line with expectations, the estimated mean dispersal distances for each  
328 guild were largest for the guilds with the highest proportion of large ranges which were

329 pelagic spawners and guilds with high adult mobility as expected.  $\alpha$  values were similar for all  
330 dispersal guilds (between 3.4 and 4.7). Estimated sampling completeness was lowest for the  
331 guilds of non-pelagic spawners with high and medium mobility (0.76 and 0.48%  
332 respectively), similarly low for the guild of pelagic spawners (3 - 9%) and very high for the  
333 guild of non-pelagic spawners with low adult mobility (38%). Protractedness (the time it takes  
334 for an incipient species to become a true species) values were the lowest for non-pelagic  
335 fishes, low mobility species (13 generations), while values were intermediate for pelagic  
336 spawners (160-730 generations) and highest for non-pelagic spawners with high and  
337 intermediate mobility (3500 and 7000 generations respectively). The speciation probability  
338 parameter (giving probability for an individual to become a new incipient species) was similar  
339 to protractedness being low for pelagic spawners (0.02-0.03), similarly high for non-pelagic  
340 spawners with high and medium adult mobility (0.08, 0.06) and the lowest for non-pelagic  
341 spawners with low adult mobility (0.0007). See Table S1 for a complete description of the  
342 model estimates.

343

344 For two dispersal guilds (pelagic spawners with high and medium adult mobility), our neutral  
345 model could not fully explain the bimodality in their range size distribution. This mismatch  
346 was strongest for pelagic spawners with medium adult mobility (Fig. 3). To explore what  
347 caused these mismatches, we performed further analyses, in which we plotted the distribution  
348 of ranges for fishes that are endemic to the TEP and one for the non-endemics (following  
349 Robertson & Allen 2016). The distribution of ranges in the TEP for these two groups showed  
350 differences for all guilds, but especially for the guild of pelagic spawners with medium  
351 mobility (Fig. 4). In this case, the bimodality does not appear in either endemics or non-  
352 endemics when separated, the combination of these two different distributions thus explains  
353 the observed bimodality in the overall distribution.

354

## 355 **Discussion**

356 For decades, macroecologists have tried to understand the large variation in range sizes across  
357 species. Using a new approach comprised of several spatially explicit neutral models, we have  
358 shown that range size variation can emerge from stochastic birth, death, speciation and  
359 variable dispersal abilities. Due to the mixed results of other studies, the importance of  
360 dispersal ability in explaining range size variation has often been questioned (Lester &  
361 Ruttenberg 2005, Luiz *et al.* 2013, Ruttenberg & Lester 2015). Here, we show that dispersal is  
362 really an important factor shaping the range size distribution of species, but that our detailed  
363 analyses were required to see this. For example, a study of only species with pelagic eggs may  
364 not have revealed any clear effect of dispersal. High dispersal produces distributions with a  
365 large proportion of species with large ranges, whereas low dispersal produces a large  
366 proportion of small ranged species, consistent with a positive relationship between dispersal  
367 and range size. Our model, however, also shows that range size variation can be large within  
368 dispersal guilds, as dispersal only affects the *probability* to have large or small ranges. Thus,  
369 although low dispersal produces distributions with a large proportion of small ranges, there  
370 are also some species with large ranges, and vice versa for high dispersal. This also helps  
371 explain why it has been challenging for empirical studies to show clear links between  
372 dispersal ability and range size: for each level of dispersal ability, a large variation in range  
373 sizes is still possible. Our neutral model predicts range size distributions with a close fit to the  
374 empirical distributions for six different dispersal guilds of reef fishes in the TEP, and for each  
375 guild estimated mean dispersal distance was in line with expectations, indicating that despite  
376 their simplicity, neutral models still capture the most important processes for driving range  
377 size variation within such guilds. Importantly, the neutral models we used were originally  
378 developed to understand other macroecological patterns (Hubbell 2001), and thus can be seen



379 as an independent mechanistic tool, rather than a phenomenological construct tailored to fit  
380 one pattern only.

381

382 Although our models generally fitted empirical range size distributions adequately, there were  
383 some exceptions. Within guilds of pelagic spawners with high and medium adult mobility,  
384 range size distribution tended to be bimodal, something that could not be explained by neutral  
385 processes alone. We found that this bimodality primarily resulted from the combination of  
386 two different background distributions: TEP endemics vs. TEP non-endemics, with the  
387 endemics generally having larger ranges within the TEP. We hypothesize that the former have  
388 had a longer time to increase their ranges in the region whilst the latter are biased by including  
389 the edges of many wider ranged species that mostly occupy areas outside the TEP. We also  
390 found that the range size distribution of non-endemic, pelagic spawners with medium mobility  
391 was bimodal (Fig. 4e). A possible explanation is that this is due to their origin, with some  
392 species coming originally from temperate regions (North and South America), and others  
393 from tropical areas outside the TEP. We conjecture that the majority of species with large  
394 ranges are trans-Pacific species, already adapted to tropical conditions. In contrast, 22 out of  
395 the 24 species with very small ranges come from temperate regions, and it is likely that their  
396 adaptations to a temperate climate and asymmetrical dispersal made these species less able to  
397 expand their ranges into areas with more tropical conditions (Holt 2003). In fact, species  
398 coming from the temperate north do not go down to the south and vice versa, whereas  
399 transpacific species are well distributed along the coast (Fig. S5).

400

401 Our results showed that in addition to dispersal, speciation and sampling intensity can also  
402 play an important role in shaping the distribution of range sizes. When sampling effort was  
403 low, only a single individual was detected for many species (hence they were treated as

404 singletons, even if more individuals were present but not observed), leading to a high  
405 proportion of species with very small ranges. The proportion of species with small ranges also  
406 increased when speciation rates were high, or when speciation was a fast, non-gradual process  
407 (low protractedness). In these cases, new species emerged continuously with low abundance  
408 and restricted range. This outcome is in line with hypotheses attempting to explain why range  
409 sizes in the tropics are usually smaller than in temperate regions such as ‘Rapoport’s rule’  
410 (Rapoport 1982), which proposes that higher speciation rates in the tropics have caused this  
411 pattern (Stevens 1989). Future empirical studies may potentially provide better tests of the  
412 validity of our model outcomes. For instance, our predictions of how observed range size  
413 distributions change when communities are increasingly intensively sampled, leading to larger  
414 ranges as second conspecific individuals are seen for many singleton species.

415

416 While we could explain range size distributions using neutral models within guilds, average  
417 range size varied across guilds, and observed species characteristics: both differences in adult  
418 mobility and spawning mode. The estimated dispersal abilities from our models suggest that  
419 differences in average range size are strongly influenced by dispersal. Consistent with  
420 previous studies on neutral models with guild structure (using predictions for abundance  
421 instead of range size, Janzen *et al.* 2015, Aduse-Poku *et al.* 2017), our results show that while  
422 community dynamics within guilds may be captured by a neutral model, across guilds niche-  
423 based processes drive variation in range size. Neutral theory was originally proposed to  
424 describe community assembly within guilds (Hubbell 2001), and our results are consistent  
425 with this philosophy. We take the concept further however, and show that across guilds,  
426 niche-based processes, in this case differing dispersal strategies, play a larger role in driving  
427 ecological patterns.

428

429 We have shown here how variation in range size across species can be explained by a  
430 combination of neutral processes and guild-specific differences in dispersal. Our findings thus  
431 make substantial progress towards settling a long-standing debate about the underlying causes  
432 of variation in range size, and the role of dispersal in this pattern.

433

434

### 435 **Acknowledgments**

436 AA was funded by the Ubbo Emmius Fund and by BelSpo IAP project ‘SPatial and  
437 environmental determinants of Eco-Evolutionary DYnamics: anthropogenic environments as  
438 a model’. TJ is grateful for use of the computational cluster ADA of the Max Planck Institute  
439 for Evolutionary Biology, Plön, and the use of the computational cluster Peregrine, of the  
440 University of Groningen. JR was funded by fellowships from the Natural Environment  
441 Research Council (NERC) (NE/I021179, NE/L011611/1). Through JR, this study is a  
442 contribution to Imperial College’s Grand Challenges in Eco- systems and the Environment  
443 initiative. DB and RE received support from the FWO research community EVENET and  
444 FWO project G.018017.N. RSE received support by a VICI grant (865.13.003) from the  
445 Netherlands Organisation for Scientific Research (NWO).

446 **References**

- 447 1. Addis, D. T., Patterson III, W. F., Dance, M. A. & Ingram Jr, G. W. (2013).  
448 Implication of reef fish movement from unreported artificial reef sites in the northern  
449 Gulf of Mexico. *Fisheries Research*. 147, 349-358.
- 450 2. Aduse-Poku, K., Molleman, F., Oduro, W., Opong, S.K., Lohman, D.J. & Etienne,  
451 R.S. (2017). Relative contribution of neutral and deterministic processes in shaping  
452 fruit-feeding butterfly assemblages in Afrotropical forests. *Ecol. Evol.* In  
453 press. <https://doi.org/10.1002/ece3.3618>
- 454 3. Alzate, A. Zapata, F.A. & Giraldo, A. (2014). A comparison of visual and collection-  
455 based methods for assessing for community structure of coral reef fishes in the  
456 Tropical Eastern Pacific. *Rev. Biol. Trop.* 62(1), 359-371.
- 457 4. Anderson, S. (1985). The theory of range-size (RS) distributions. *Am. Mus. Novitates*.  
458 2833, 1-20.
- 459 5. Appeldoorn, R. S., Hensley, D. A., Shapiro, D. G., Kioroglou, S. & Sanderson, B. G.  
460 (1994). Egg dispersal in a Caribbean coral reef fish, *Thalassoma bifasciatum*. II.  
461 Dispersal off the reef platform. *Bull. Mar. Sci.* 54(1), 271-280.
- 462 6. Bonte, D., Van Dyck, H., Bullock, J. M., Coulon, A., Delgado, M., Gibbs, M.,  
463 Lehouck, V., Matthysen, E., Mustin, K., Saastamoinen, M., Schtickzelle, N., Stevens,  
464 V. M., Vandewoestijne, S., Baguette, M., Barton, K., Benton, T. G., Chaput-Bardy,  
465 A., Clobert, J., Dytham, C., Hovestadt, T., Meier, C. M., Palmer, S. C. F., Turlure, C.  
466 & Travis, J. M. J. (2012). Costs of dispersal. *Biol. Rev.* 87, 290–312.
- 467 7. Brown, J.H. & Kondric-Brown, A. (1977). Turnover rates in insular biogeography:  
468 effects of immigration on extinction. *Ecology*. 58, 445-449.
- 469 8. Dennis, R.L.H. & Hardy, P.B. (1999). Targeting squares for survey: predicting species  
470 richness and incidence of species for a butterfly atlas. *Global. Ecol. Biogeogr.* 8(6),  
471 443-454.
- 472 9. Gaston, K.J. (1996). Species-range-size distributions: patterns, mechanisms and  
473 implications. *TREE*. 11, 197-201.
- 474 10. Gaston, K.J. (2003). The structure and dynamics of geographic ranges. Oxford  
475 University Press. New York, USA, pp. 266.
- 476 11. Gaston, K.J. & Chown, S.L. (1999). Geographic range size and speciation. In  
477 *Evolution of biological diversity*. (ed. A.E. Magurran & R.M. May), pp. 236-259.  
478 Oxford University Press.

- 479 12. Gaston, K.J. & He, F. (2002). The distribution of species range size: a stochastic  
480 process. *Proc. R. Soc. B.* 269, 1079-1086.
- 481 13. Lester, S. E. & Ruttenberg, B. I. (2005). The relationship between pelagic larval  
482 duration and range size in tropical reef fishes: a synthetic analysis. *Proc. R. Soc. B.* 72,  
483 585-591.
- 484 14. Luiz, O. J., Allen, A. P., Robertson, D. R., Floeter, S. R., Kulbicki, M., Vigliola, L.,  
485 Becheler, R. & Madin, J. S. (2013). Adult and larval traits as determinants of  
486 geographic range size among tropical reef fishes. *PNAS.* 110(41), 16498-16502.
- 487 15. MacArthur, R.H. & Wilson, E.O. (1967). *The theory of island biogeography.*  
488 Princeton University Press, pp. 203.
- 489 16. Mora, C., Treml, E., Robert. J., Crosby, K., Roy, D. & Titterson, D. P. (2012). High  
490 connectivity among habitats precludes the relationship between dispersal and range  
491 size in tropical reef fishes. *Ecography.* 35(1), 89–96.
- 492 17. Holt, R.D. & Gomulkiewicz, R. (1996). The evolution of species' niches: a population  
493 dynamic perspective. In *Case studies in mathematical modelling* (ed. H.G. Othmer.,  
494 F.R. Adler., M.A. Lewis. & L.C. Dallon), pp. 25-50. Saddle River, NJ: Prentice-Hall.
- 495 18. Ruttenberg, B.I. & Lester, S.E. (2015). Patterns and processes in geographic range size  
496 in coral reef fishes. In *Ecology of fishes on coral reefs* (ed. Mora, C.), pp 97-103.  
497 Cambridge University Press, Cambridge, United Kingdom.
- 498 19. Webb, T.J. & Gaston, K.J. (2000). Geographic range size and evolutionary age in  
499 birds. *Proc. R. Soc. B.* 267 (1455), 1843-1850.
- 500 20. Stahl, U., Reu, B. & Wirth, C. (2014). Predicting species range limits from functional  
501 traits for the tree flora of North America. *PNAS.* 111, 13739-13744.
- 502 21. Dennis, R.L.H., Sparks, T.H. & Hardy, B.P. (1999). Bias in butterfly distribution  
503 maps: the effect of sampling effort. *J. Insect. Conserv.* 3, 33–42.
- 504 22. Lester, S. E., Ruttenberg, B. I., Gaines, S. D. & Kinlan, B. P. (2007). The relationship  
505 between dispersal ability and geographic range size. *Ecol. Lett.* 10, 745–758.
- 506 23. Leis, J.M. (1978). Systematics and zoogeography of the porcupinefishes (Diodon,  
507 Diodontidae, Tetraodontiformes), with comments on egg and larvae development.  
508 *Fish. Bull.* 76 (3), 535-567.
- 509 24. Kaunda-Arara, B. & Rose, G. A. (2004). Long-distance movements of coral reef  
510 fishes. *Coral Reefs.* 23, 410-412.
- 511 25. Hanski, I. (1982). Dynamics of regional distribution: the core and satellite species  
512 hypothesis. *Oikos.* 38, 210-221.

- 513 26. Hubbell, S. P. (2001) The Unified Neutral Theory of Biodiversity and Biogeography.  
514 Princeton University Press, Princeton, NJ, pp. 392.
- 515 27. Rosindell, J., Wong, Y. & Etienne, R.S. (2008). A coalescence approach to spatial  
516 neutral ecology. *Ecol. Inform.* 3(3), 259-271.
- 517 28. Rosindell, J. & Phillimore, A.B. (2011). A unified model of island biogeography  
518 sheds light on the zone of radiation. *Ecol. Lett.* 14, 552-560.
- 519 29. Riginos, C., Douglas, C.E., Jin, Y., Shanahan, D.F. & Treml, E.A. (2011). Effects of  
520 geography and life history traits on genetic differentiation in benthic marine fishes.  
521 *Ecography.* 34, 566-575.
- 522 30. Robertson, D. R. & Allen, G. (2016). Fishes: East Pacific. An Identification Guide to  
523 the Shore-Fish Fauna of the Tropical Eastern Pacific. (Copyright Smithsonian  
524 Institution, Left Coast R&C, Santa Cruz, California).  
525 <http://biogeodb.stri.si.edu/bioinformatics/sfstep/taxon.php>, accessed in 2016.
- 526 31. Leis, J.M., Caselle, J.E., Bradbury, I.R., Kristiansen, T., Llopiz, J.K., Miller, M.J.,  
527 O'Connor, M.I., Paris, C.B., Shanks, A.L., Sogard, S.M., Swearer, S.E., Treml, E.A.,  
528 Vetter, R.D. & Warner, R.R. (2013). Does fish larvae dispersal differ between high  
529 and low latitudes? *Proc. R. Soc. B.* 280: 20130327.
- 530 32. Wootton, R. J. (1992). Fish Ecology. Chapman & Hall, New York, pp. 212.
- 531 33. Munday, P. L. & Jones, G. P. (1998). The ecological implications of small body size  
532 among coral-reef fishes. *Oceanography and Marine Biology: An Annual Review.* 36,  
533 373-411.
- 534 34. Leis, J.M. (2006). Are larvae of demersal fishes plankton or nekton. *Advances in*  
535 *Marine Biology.* 51, 57-141.
- 536 35. Floeter, S. R., Ferreira, C. E. L., Dominici-Arosemena, A. & Zalmon, I. R. (2004).  
537 Latitudinal gradients in Atlantic reef fish communities: trophic structure and spatial  
538 use patterns. *J. Fish. Biol.* 64, 1680-1699.
- 539 36. Magnusson, A. (2015) gmt: Interface between GMT map-making software and R. R  
540 package version 1.2-0. <http://CRAN.R-project.org/package=gmt>. Accessed April  
541 2015.
- 542 37. Toni, T., Welch, D., Strelkova, N., Ipsen, A. & Stumpf, M.P.H. (2009). Approximate  
543 Bayesian computation scheme for parameter inference and model selection in  
544 dynamical systems. *J. Royal Soc. Interface.* 6, 187–202.
- 545 38. Holt, R.D. (2003). On the evolutionary ecology of species' ranges. *Evol. Ecol. Res.* 5,  
546 159-178.

- 547 39. Janzen, T., Haegeman, B. & Etienne, R.S. (2015). A sampling formula for ecological  
548 communities with multiple dispersal syndromes. *JEB*. 374, 94-106.
- 549 40. Rapoport, E.H. (1982). *Aerography: Geographical Strategies of Species*. Pergamon  
550 Press, New York, pp. 269.
- 551 41. Rosindell, J., Cornell, S. J., Hubbell, S.P. & Etienne, R.S. (2010). Protracted  
552 speciation revitalizes the neutral theory of biodiversity. *Ecol. Lett.* 13(6), 716-727.
- 553 42. Stevens, G.C. (1989). The latitudinal gradient in geographical range: how so many  
554 species coexist in the tropics. *Am. Nat.* 133,240-56.
- 555 43. Stobutzki, I. C. & Bellwood, D. R. (1997). Sustained swimming abilities of the late  
556 pelagic stages of coral reef fishes. *MEPS*. 149, 35-41.
- 557
- 558
- 559
- 560

561 Figures

562 Fig. 1. (a) Distribution of range sizes for different dispersal guilds of reef fishes in the  
563 Tropical Eastern Pacific (TEP). A guild is defined as a group of species that share the same  
564 spawning mode (pelagic and non-pelagic spawners) and adult mobility (low, medium and  
565 high). Range size is shown in relative terms, where a range of 100% is the largest range  
566 recorded for a species in the TEP. We used coastline distance as the range size metric, which  
567 is the distance between the most distant points along the coastline. Individuals from oceanic  
568 islands are excluded to be consistent to the one-dimensional nature of the model. Both sides  
569 of the California Gulf coastline were shrunk into a single one. The distribution of ranges is  
570 shown as cumulative distribution curves, which show the proportion of species (y axis) that  
571 attain ranges larger than a given size (x axis). (b) Map showing the sampling intensity along  
572 the coastline in the TEP: the number of occurrences recorded at each coastline point spaced  
573 by 100 km.

574

575 Fig. 2. Effect of (a) the mean dispersal distance  $X_{\text{mean}}$ , (b) the shape parameter of the dispersal  
576 kernel  $\alpha$ , (c) the sampling proportion, (d) speciation  $\mu$ , and (e) the time to speciation  $\tau$   
577 (protractedness) on the distribution of range sizes. Lines show the average value of 100  
578 replicates and the shadows represent the 95% CI. For all simulations, the lattice size was  
579 100,000 individuals. We use one fixed parameter setting, for which only the variable of  
580 interest varied:  $s = 100\%$ ,  $\alpha = 3.0$ ,  $X_{\text{mean}} = 0.02$ ,  $\mu = 0.0005$ ,  $\tau = 10$ .

581

582 Fig. 3. Range size distributions of the best model fitted to each dispersal guild, shown as an  
583 inverse cumulative distribution curve. Mean of 5 replicates and 95% CI are shown. Dashed  
584 lines represent the empirical data and coloured bands represent the distribution of values in



585 the best fitting model for that guild. Estimated  $X_{\text{mean}}$  (mean of >90,000 estimates) are shown  
586 per each dispersal guild.

587

588 Fig. 4. Empirical range size distributions (as inverse cumulative distribution curves) for each  
589 dispersal guild. The data shown separately for species that are endemics to the TEP and for  
590 TEP non-endemic species.

591

592 Fig. 1.

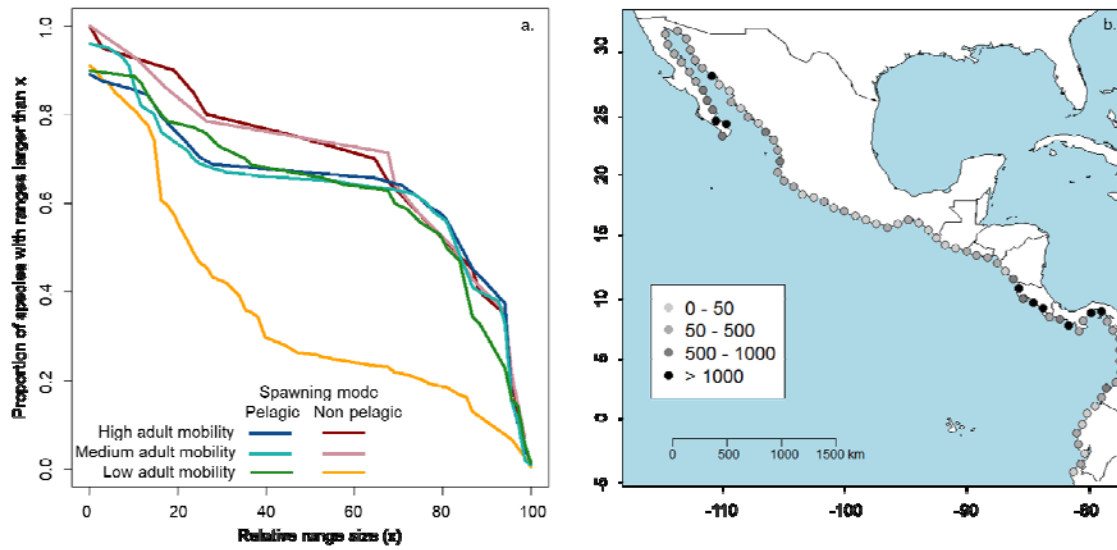

593

594 Fig. 2.

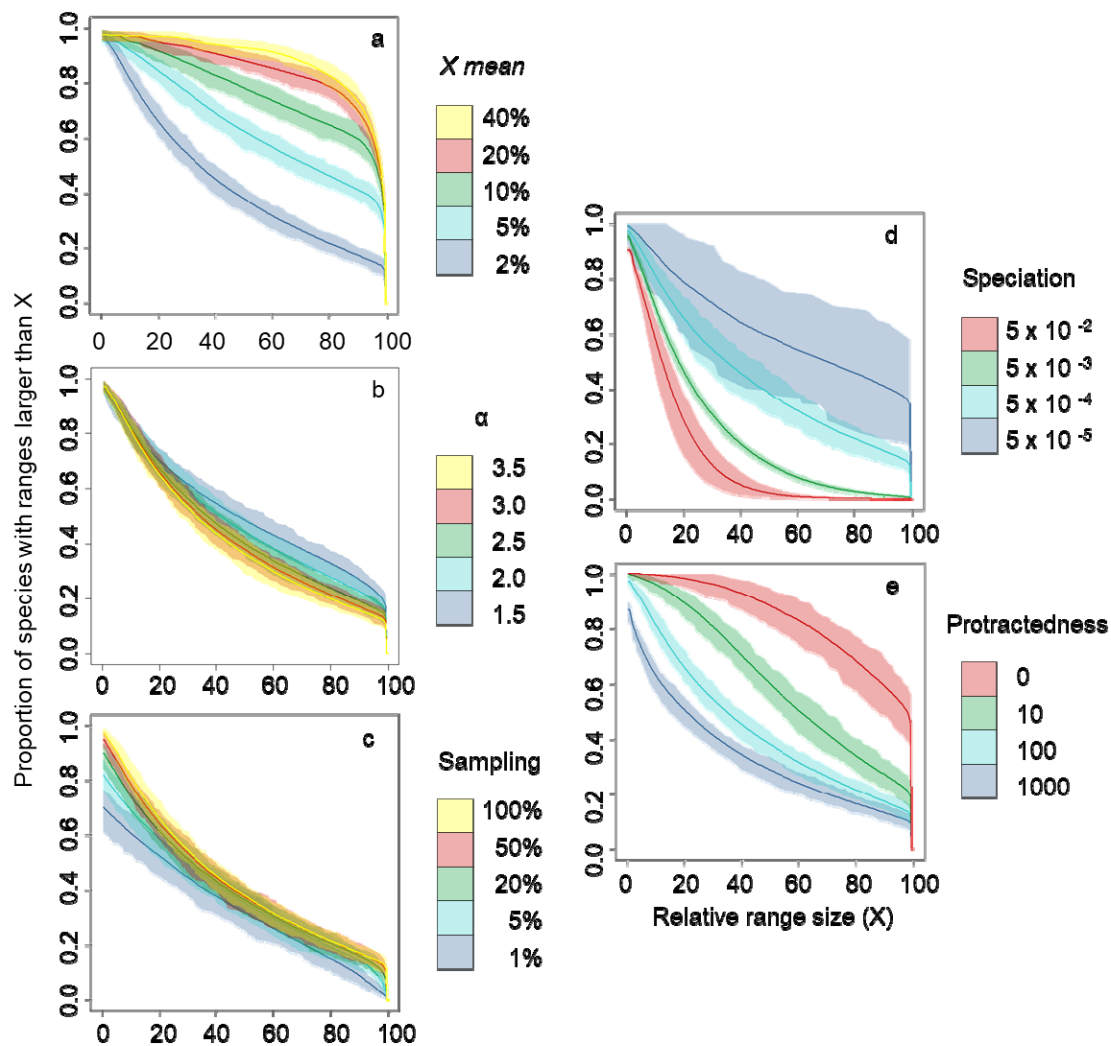

595

596

597 Fig. 3.

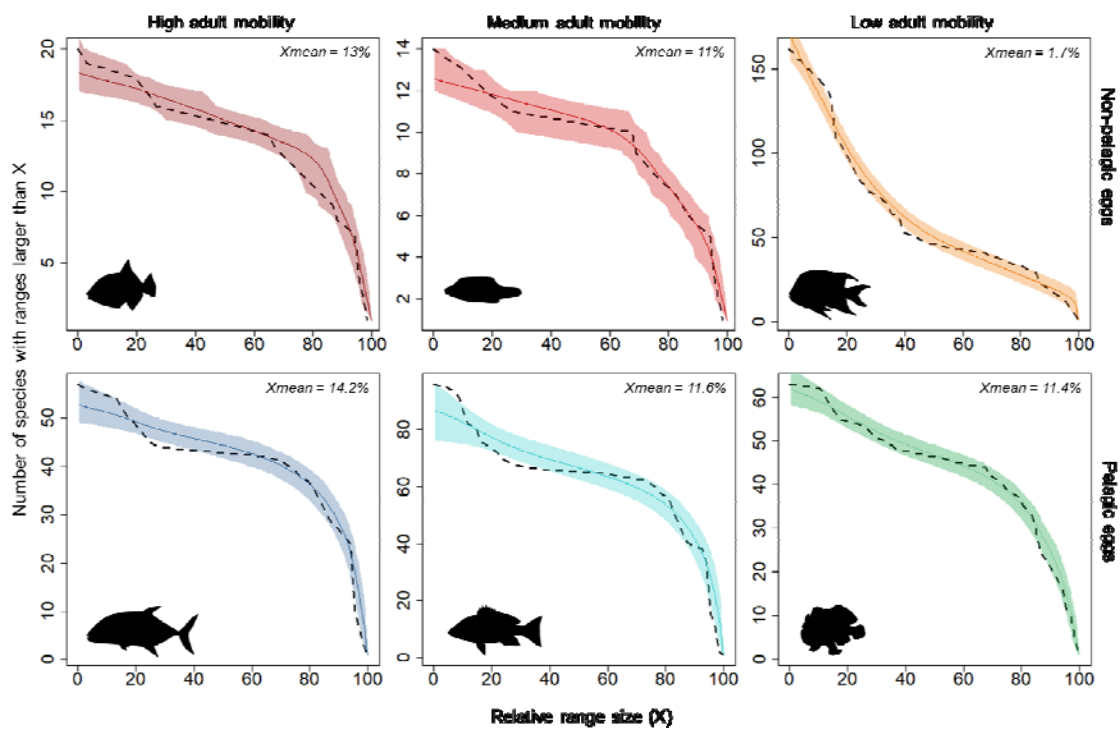

598

599 Fig. 4.

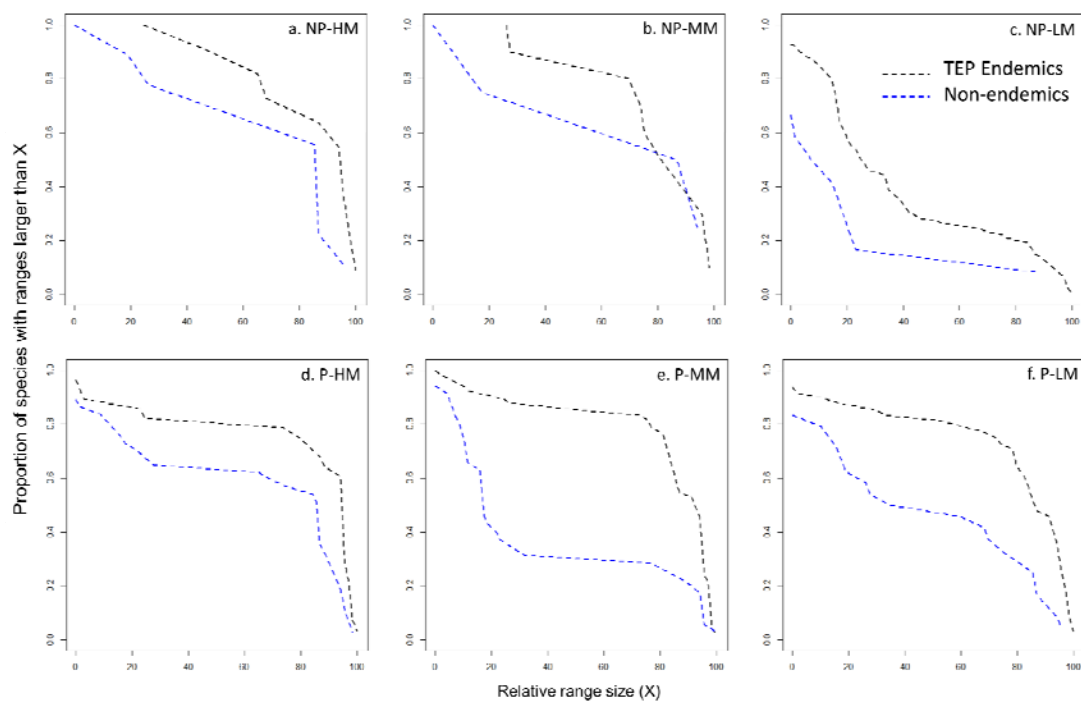

600
